# Supplementary material for: Construction of a Bi-doped g-C 3 N 4 /Bi 2 MoO 6 ternary nanocomposite for the effective photodegradation of ofloxacin under visible light irradiation
Source: Royal Society of Chemistry journal article supplement (doi:10.1039/d4ra08493d), 2025-01-01
Supplement: d4ra08493d1.pdf [file d4ra08493d1.pdf]

## Supplementary File

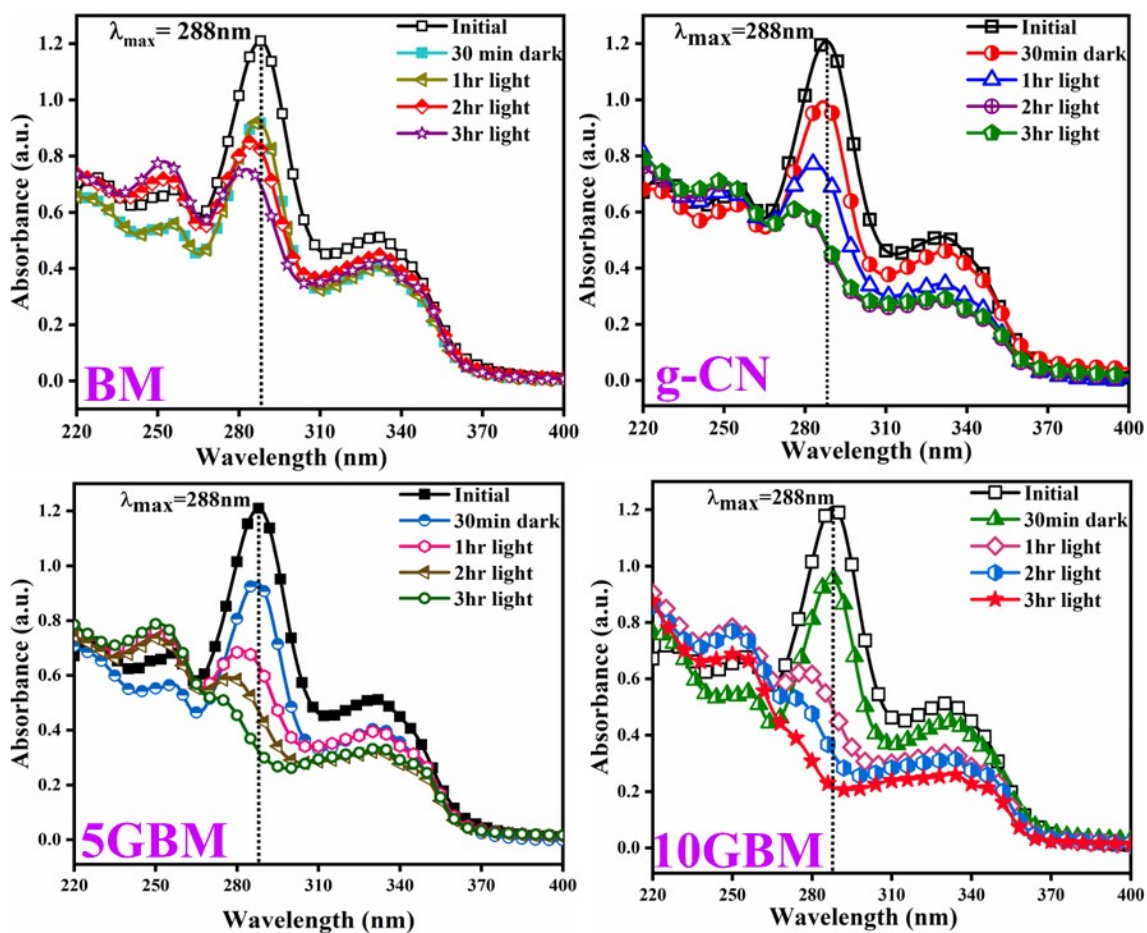

Fig. S1: Kinetic study of pristine BM, g-CN and different wt.% loaded composites.

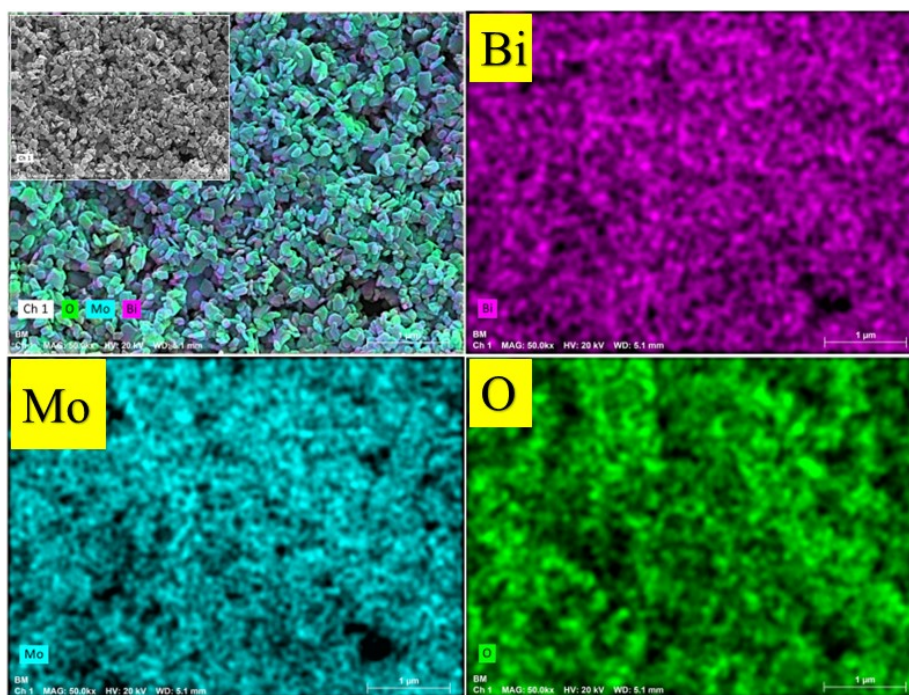

**Fig. S2: EDS mapping of pristine BM containing elements Bi, Mo and O.**

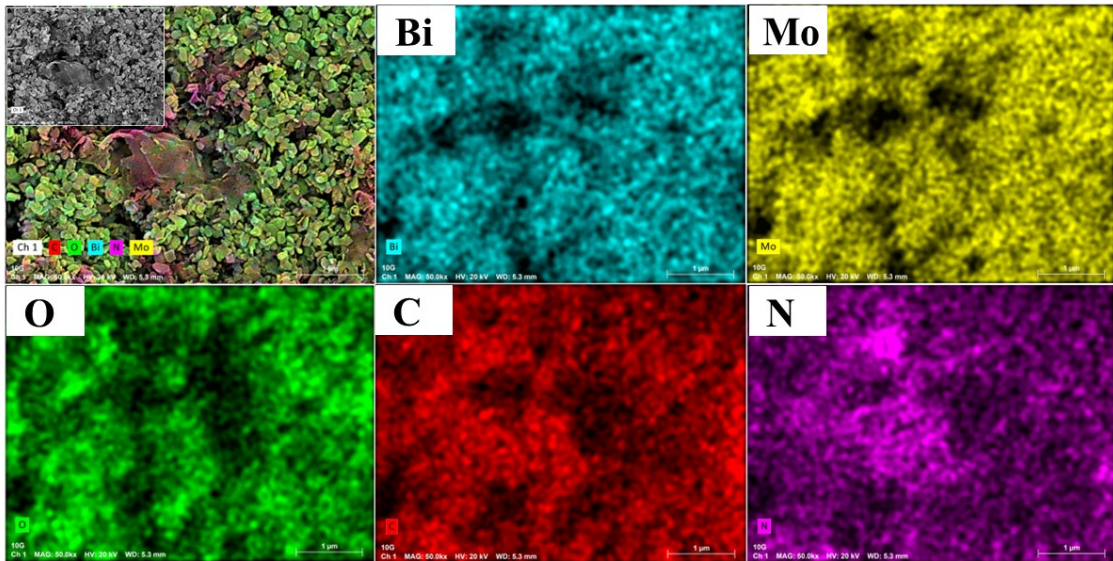

**Fig. S3: EDS mapping of ternary nanocomposite 10GBM having all the elements Bi, Mo, O, C and N.**

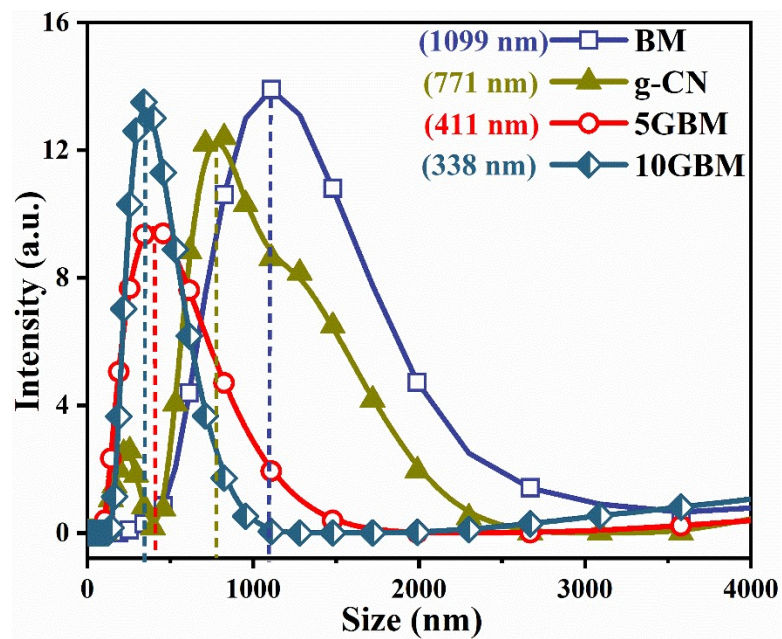

**Fig. S4: The hydrodynamic size of photocatalyst and their composites.**

03-Sep-2024  
17:30:39

XEVO-G2XSQTOF#NotSet

1: TOF MS ES+  
8.90e7

MS-03-09-2024\_1200 7 (0.147) Cm (5:11)

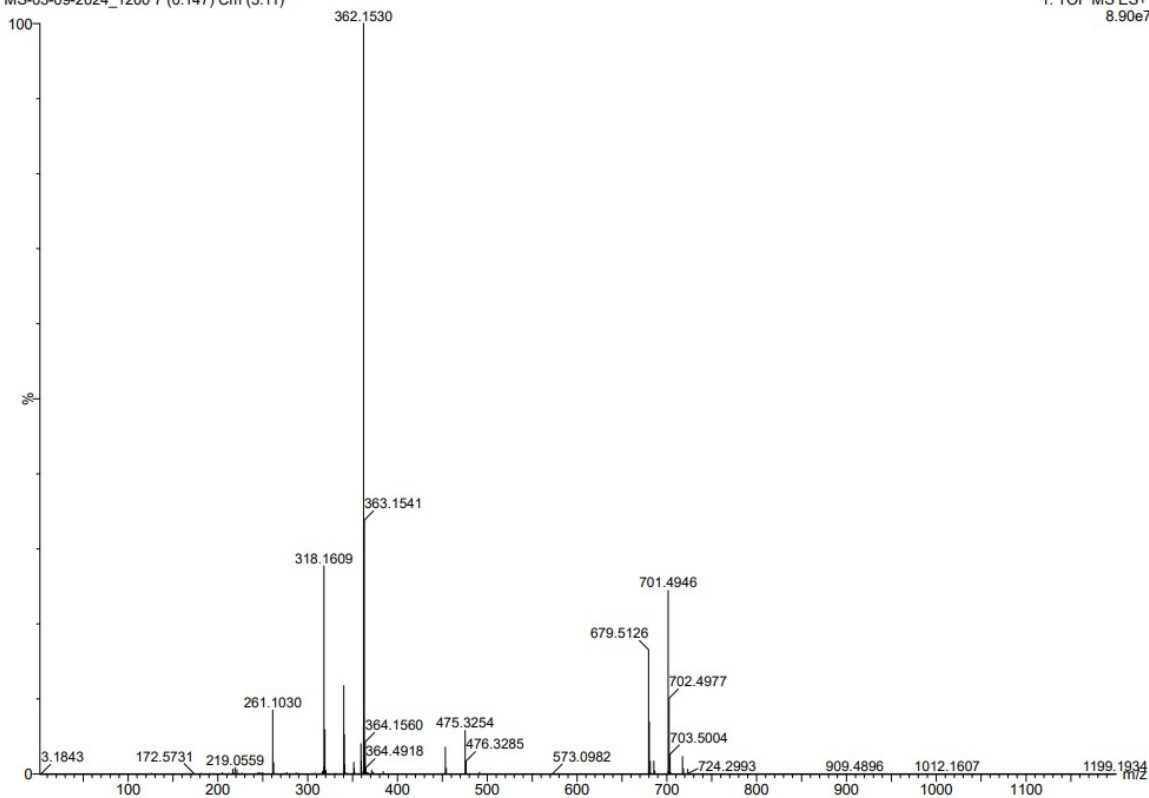

09-Aug-2024  
17:36:53

XEVO-G2XSQTOF#YFC2320

1: TOF MS ES+  
8.64e5

MS-09-08-2024\_1115 34 (0.649) Cm (23:47)

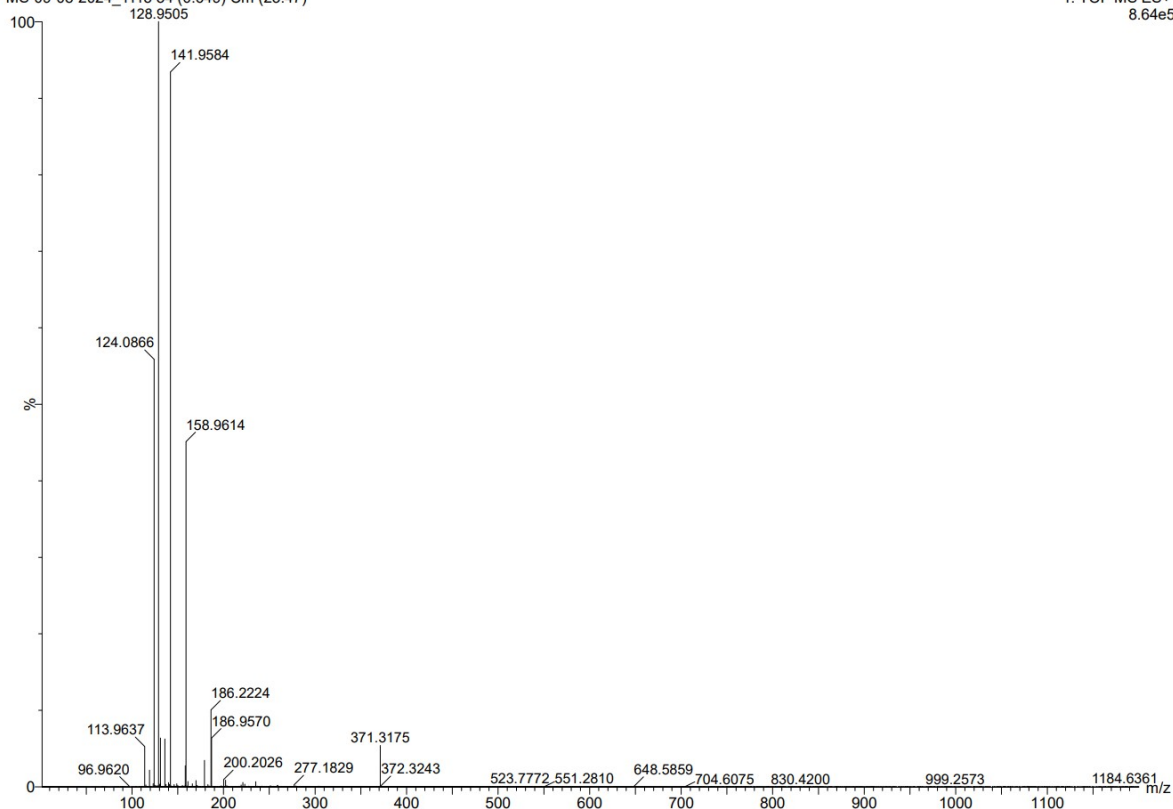

09-Aug-2024  
17:21:36

XEVO-G2XSQTOF#YFC2320

1: TOF MS ES+  
4.74e5

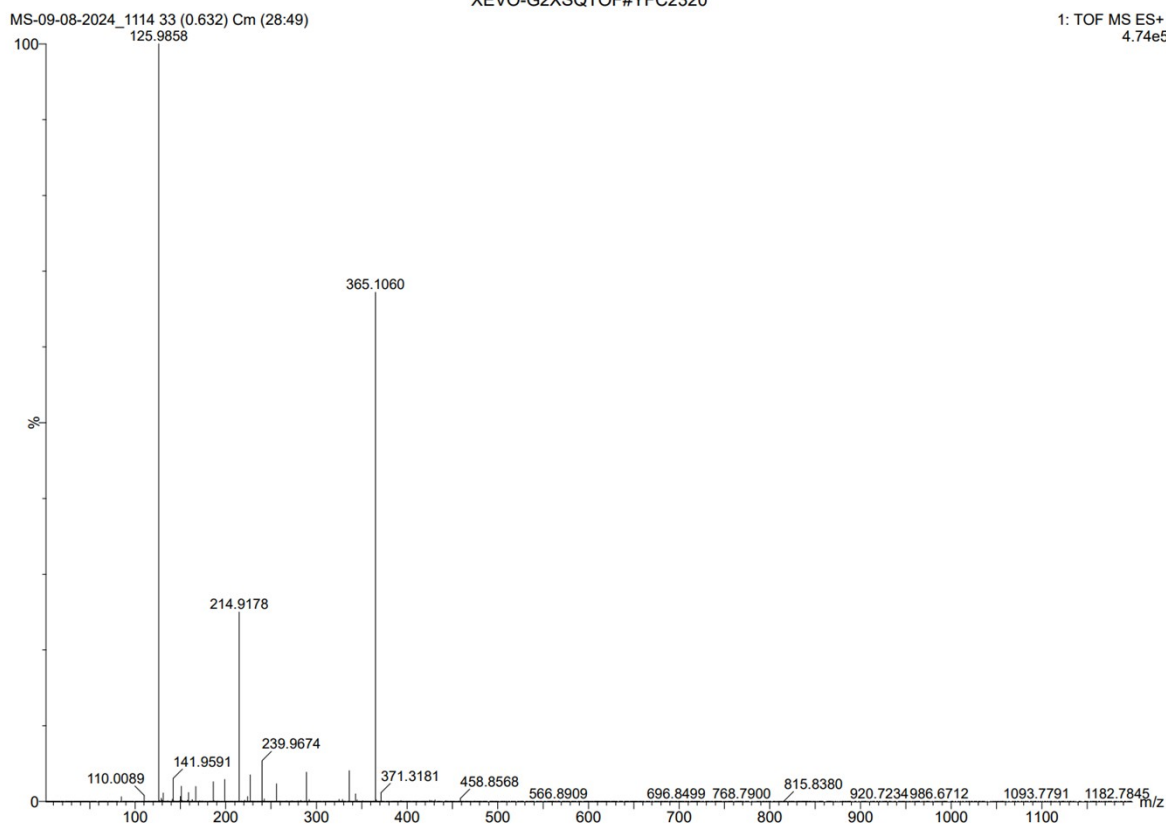

**Fig. S5: The different fragments of ofloxacin using 10GBM photocatalyst.**
